# Supplementary material for: Debtor Rights, Credit Supply, and Innovation
Source: Atypon-hosted journal article supplement (doi:10.1287/mnsc.2016.2509), 2016-08-11
Supplement: mnsc.2016.2509-sm.pdf [file mnsc.2016.2509-sm.pdf]

## Online Appendix

### For “Debtor Rights, Credit Supply and Innovation”

By Geraldo Cerqueiro, Deepak Hegde, María Fabiana Penas, Robert C. Seamans

#### Table of Contents

|                                                                                                        |
|--------------------------------------------------------------------------------------------------------|
| Table 1: Effect of right censoring on forward citation measures.                                       |
| Table 2: Timing of other laws in state                                                                 |
| Table 3: Effect of homestead exemptions on number of patents; robustness to counterfactual             |
| Table 4: Effect of homestead exemptions on number of patents for firms, different trends               |
| Table 5: Effect of homestead exemptions on patent characteristics for large firms                      |
| Table 6: Effect of homestead exemptions on distribution of patent citations for large firms            |
| Table 7: Effect of homestead exemptions on large firms with high external financial dependence         |
| Table 8: Effect of homestead exemptions on large firms with low external financial dependence          |
| Table 9: Effect of total exemptions on patent characteristics for small firms                          |
| Table 10: Effect of total exemptions on distribution of patent citations for small firms               |
| Table 11: Effect of homestead exemptions dummy on patent characteristics for small firms               |
| Table 12: Effect of homestead exemptions dummy on distribution of patent citations for small firms     |
| Table 13: Effect of exemptions on patent characteristics for small firms, no Massachusetts             |
| Table 14: Effect of exemptions on distribution of patent citations for small firms, no Massachusetts   |
| Table 15: Effect of exemptions on patent characteristics for small firms, no MA, 2000-2005             |
| Table 16: Effect of exemptions on distribution of patent citations for small firms, no MA, 2000-2005   |
| Table 17: Effect of exemptions on patent characteristics for small firms, no confounding laws          |
| Table 18: Effect of exemptions on distribution of citations for small firms, no confounding laws       |
| Table 19: Effect of exemptions on 5-year forward citations for small firms                             |
| Table 20: Effect of exemptions on patent generality for small firms                                    |
| Table 21: Effect of exemptions on standard deviation of patent citations for small firms               |
| Table 22: Effect of exemptions on number of patent citations in bottom 10th percentile for small firms |
| Table 23: Effect of exemptions on number of patent citations in bottom 25th percentile for small firms |
| Table 24: Effect of exemptions on number of patent citations in top 25th percentile for small firms    |
| Table 25: Effect of exemptions on number of patent citations in top 10th percentile for small firms    |
| Table 26: Effect of exemptions on number of patent citations in tails, scaled by patent counts         |
| Table 27: Effect of personal bankruptcy exemptions on individual inventors                             |
| Table 28: Effect of homestead exemptions on innovation at state-technology-year level                  |
| Table 29: Distribution of incumbents and entrants                                                      |

**Appendix Table 1.**

Effect of right censoring on forward citation measures.

This table provides year-by-year averages for four measures based on five-year forward citations using data from USPTO, 1995-2005. Forward citations suffer a well-known censoring problem. The data we use from the USPTO is current as of 2012, so the censoring is less of an issue than if we were to rely on NBER patent data as of 2006. The effect of censoring is nevertheless apparent in the latter two to three years for each measure.

| Year | Forward Citations | Patent Generality |
|------|-------------------|-------------------|
| 1995 | 0.380             | 0.261             |
| 1996 | 0.696             | 0.264             |
| 1997 | 1.076             | 0.265             |
| 1998 | 1.400             | 0.253             |
| 1999 | 1.641             | 0.244             |
| 2000 | 1.772             | 0.227             |
| 2001 | 1.991             | 0.203             |
| 2002 | 1.895             | 0.182             |
| 2003 | 1.584             | 0.149             |
| 2004 | 1.282             | 0.103             |
| 2005 | 0.887             | 0.062             |

**Appendix Table 2.**

Timing of other laws in state.

Column 1 displays the number of states that amended either their homestead exemption or their personal property exemption (jewelry, motor vehicles, cash, deposits, and “wildcard”).

| Year    | (1)<br>Number of states that<br>passed exemption laws | (2)<br>of which change<br>corporate income tax | (3)<br>of which change<br>state bank tax | (4)<br>of which change<br>R&D credits | (5)<br>of which change<br>invest tax credits | (6)<br>of which change<br>job tax credit |
|---------|-------------------------------------------------------|------------------------------------------------|------------------------------------------|---------------------------------------|----------------------------------------------|------------------------------------------|
| 1995    | 4                                                     | 0                                              | 1 (CA)                                   | 0                                     | 0                                            | 0                                        |
| 1996    | 4                                                     | 0                                              | 0                                        | 0                                     | 0                                            | 1(MN)                                    |
| 1997    | 5                                                     | 0                                              | 0                                        | 0                                     | 0                                            | 0                                        |
| 1998    | 8                                                     | 0                                              | 0                                        | 1(RI)                                 | 1(RI)                                        | 0                                        |
| 1999    | 7                                                     | 0                                              | 0                                        | 2(MT, UT)                             | 0                                            | 0                                        |
| 2000    | 4                                                     | 1 (CO)                                         | 1 (CO)                                   | 0                                     | 0                                            | 0                                        |
| 2001    | 9                                                     | 1 (AZ)                                         | 1 (AZ)                                   | 1(AZ)                                 | 0                                            | 0                                        |
| 2002    | 3                                                     | 0                                              | 0                                        | 0                                     | 0                                            | 0                                        |
| 2003    | 4                                                     | 0                                              | 0                                        | 0                                     | 0                                            | 0                                        |
| 2004    | 13                                                    | 0                                              | 0                                        | 0                                     | 0                                            | 0                                        |
| 2005    | 5                                                     | 0                                              | 0                                        | 0                                     | 0                                            | 0                                        |
| Totals: | 66                                                    | 2                                              | 3                                        | 4                                     | 1                                            | 1                                        |

**Appendix Table 3**

Effect of homestead exemptions on number of patents; robustness to alternative definitions and counterfactuals

|                         | (1)                 | (2)               | (3)                       | (4)                       | (5)               |
|-------------------------|---------------------|-------------------|---------------------------|---------------------------|-------------------|
| Firm Size               | Small, One State    | Large, One State  | Small, One or More States | Large, One or More States | University        |
| Homestead               | -0.072**<br>[0.032] | -0.034<br>[0.057] | -0.047*<br>[0.026]        | -0.014<br>[0.043]         | -0.029<br>[0.039] |
| Time-Varying State Vars | Yes                 | Yes               | Yes                       | Yes                       | Yes               |
| Year Dummies            | Yes                 | Yes               | Yes                       | Yes                       | Yes               |
| Assignee Fixed Effects  | Yes                 | Yes               | Yes                       | Yes                       | Yes               |
| Subcategory*Trend       | Yes                 | Yes               | Yes                       | Yes                       | Yes               |
| Observations            | 284,621             | 93,398            | 336,604                   | 165,159                   | 5,710             |
| Num. State or Assignee  | 40,811              | 12,259            | 46,762                    | 20,023                    | 580               |
| Log likelihood          | -107080             | -46370            | -166625                   | -248368                   | -9482             |

**Appendix Table 4**

Effect of homestead exemptions on number of patents for firms, different trends

|                         | (1)                 | (2)                | (3)                | (4)               | (5)              | (6)               |
|-------------------------|---------------------|--------------------|--------------------|-------------------|------------------|-------------------|
| Firm size               | Small               |                    |                    | Large             |                  |                   |
| Homestead               | -0.072**<br>[0.032] | -0.060*<br>[0.032] | -0.073*<br>[0.042] | -0.014<br>[0.043] | 0.053<br>[0.042] | -0.049<br>[0.061] |
| Time-Varying State Vars | Yes                 | Yes                | Yes                | Yes               | Yes              | Yes               |
| Year Dummies            | Yes                 | Yes                | Yes                | Yes               | Yes              | Yes               |
| Assignee Fixed Effects  | Yes                 | Yes                | Yes                | Yes               | Yes              | Yes               |
| Subcategory*Trend       | Yes                 | No                 | No                 | Yes               | No               | No                |
| State*Trend             | No                  | Yes                | No                 | No                | Yes              | No                |
| State*Pretrend          | No                  | No                 | Yes                | No                | No               | Yes               |
| Observations            | 284,621             | 284,621            | 284,621            | 165,159           | 165,159          | 165,159           |
| Num. Assignee           | 40,811              | 40,811             | 40,811             | 20,023            | 20,023           | 20,023            |
| Log likelihood          | -107080             | -107209            | -107646            | -248368           | -248202          | -254118           |

**Appendix Table 5**

Effect of homestead exemptions on patent characteristics for large firms

| Dependent Variable      | (1)<br>Forward Cites | (2)<br>Generality | (3)<br>Originality | (4)<br>Exploration |
|-------------------------|----------------------|-------------------|--------------------|--------------------|
| Homestead exemptions    | -0.009<br>[0.037]    | 0.013<br>[0.025]  | 0.014<br>[0.018]   | 0.005<br>[0.022]   |
| Time-Varying State Vars | Yes                  | Yes               | Yes                | Yes                |
| Subcategory*Trend       | Yes                  | Yes               | Yes                | Yes                |
| Calendar Year Effects   | Yes                  | Yes               | Yes                | Yes                |
| Assignee Fixed Effects  | Yes                  | Yes               | Yes                | Yes                |
| Observations            | 149,839              | 129,991           | 154,334            | 165,159            |
| Number of assignees     | 17,428               | 14,765            | 18,658             | 20,023             |
| Log likelihood          | -214899              | -228263           | -41971             | -110837            |

**Appendix Table 6**

Effect of homestead exemptions on distribution of patent citations for large firms

| Dependent Variable:     | (1)<br>Standard<br>Deviation | (2)<br>Bottom 10th<br>Pctile | (3)<br>Bottom 25th<br>Pctile | (4)<br>Top 25th<br>Pctile | (5)<br>Top 10th<br>Pctile |
|-------------------------|------------------------------|------------------------------|------------------------------|---------------------------|---------------------------|
| Homestead exemptions    | -0.060*<br>[0.033]           | 0.028<br>[0.039]             | 0.017<br>[0.042]             | -0.044<br>[0.038]         | -0.062<br>[0.041]         |
| Time-Varying State Vars | Yes                          | Yes                          | Yes                          | Yes                       | Yes                       |
| Subcategory*Trend       | Yes                          | Yes                          | Yes                          | Yes                       | Yes                       |
| Calender Year Effects   | Yes                          | Yes                          | Yes                          | Yes                       | Yes                       |
| Assignee Fixed Effects  | Yes                          | Yes                          | Yes                          | Yes                       | Yes                       |
| Observations            | 85,399                       | 99,225                       | 121,327                      | 87,316                    | 54,472                    |
| Number of assignees     | 9,395                        | 12,028                       | 14,464                       | 9,831                     | 5,985                     |
| Log likelihood          | -192739                      | -117992                      | -113005                      | -113816                   | -127373                   |

**Appendix Table 7**

Effect of homestead exemptions on innovation for large firms with high external financial dependence

|                         | (1)               | (2)               | (3)              | (4)              | (5)               | (6)                   | (7)                      | (8)                      | (9)                | (10)               |
|-------------------------|-------------------|-------------------|------------------|------------------|-------------------|-----------------------|--------------------------|--------------------------|--------------------|--------------------|
| Dependent Variable:     | Patents           | Forward<br>Cites  | Generality       | Originality      | Exploration       | Standard<br>Deviation | Bottom<br>10th<br>Pctile | Bottom<br>25th<br>Pctile | Top 25th<br>Pctile | Top 10th<br>Pctile |
| Homestead exemptions    | -0.055<br>[0.056] | -0.020<br>[0.054] | 0.008<br>[0.032] | 0.010<br>[0.023] | -0.004<br>[0.029] | -0.054<br>[0.043]     | 0.001<br>[0.052]         | -0.012<br>[0.056]        | -0.078<br>[0.050]  | -0.094*<br>[0.054] |
| Time-Varying State Vars | Yes               | Yes               | Yes              | Yes              | Yes               | Yes                   | Yes                      | Yes                      | Yes                | Yes                |
| Subcategory*Trend       | Yes               | Yes               | Yes              | Yes              | Yes               | Yes                   | Yes                      | Yes                      | Yes                | Yes                |
| Calendar Year Effects   | Yes               | Yes               | Yes              | Yes              | Yes               | Yes                   | Yes                      | Yes                      | Yes                | Yes                |
| Assignee Fixed Effects  | Yes               | Yes               | Yes              | Yes              | Yes               | Yes                   | Yes                      | Yes                      | Yes                | Yes                |
| Observations            | 87,517            | 80,738            | 72,165           | 82,415           | 87,517            | 46,085                | 50,761                   | 62,681                   | 48,720             | 31,551             |
| Number of assignees     | 10,843            | 9,600             | 8,406            | 10,181           | 10,843            | 5,178                 | 6,298                    | 7,640                    | 5,605              | 3,544              |
| Log likelihood          | -151867           | -131549           | -132715          | -23065           | -59360            | -118234               | -68632                   | -67090                   | -69719             | -79071             |

**Appendix Table 8**

Effect of homestead exemptions on innovation for large firms with low external financial dependence

|                         | (1)              | (2)              | (3)              | (4)              | (5)              | (6)                   | (7)                      | (8)                      | (9)                | (10)               |
|-------------------------|------------------|------------------|------------------|------------------|------------------|-----------------------|--------------------------|--------------------------|--------------------|--------------------|
| Dependent Variable:     | Patents          | Forward<br>Cites | Generality       | Originality      | Exploration      | Standard<br>Deviation | Bottom<br>10th<br>Pctile | Bottom<br>25th<br>Pctile | Top 25th<br>Pctile | Top 10th<br>Pctile |
| Homestead exemptions    | 0.068<br>[0.054] | 0.011<br>[0.043] | 0.031<br>[0.040] | 0.021<br>[0.028] | 0.021<br>[0.034] | -0.067<br>[0.047]     | 0.090<br>[0.057]         | 0.076<br>[0.057]         | 0.029<br>[0.051]   | 0.012<br>[0.056]   |
| Time-Varying State Vars | Yes              | Yes              | Yes              | Yes              | Yes              | Yes                   | Yes                      | Yes                      | Yes                | Yes                |
| Subcategory*Trend       | Yes              | Yes              | Yes              | Yes              | Yes              | Yes                   | Yes                      | Yes                      | Yes                | Yes                |
| Calender Year Effects   | Yes              | Yes              | Yes              | Yes              | Yes              | Yes                   | Yes                      | Yes                      | Yes                | Yes                |
| Assignee Fixed Effects  | Yes              | Yes              | Yes              | Yes              | Yes              | Yes                   | Yes                      | Yes                      | Yes                | Yes                |
| Observations            | 77,642           | 69,101           | 57,826           | 71,919           | 77,642           | 39,314                | 48,464                   | 58,646                   | 38,596             | 22,921             |
| Number of assignees     | 9,180            | 7,828            | 6,359            | 8,477            | 9,180            | 4,217                 | 5,730                    | 6,824                    | 4,226              | 2,441              |
| Log likelihood          | -96092           | -83280           | -95498           | -18904           | -51468           | -74444                | -49232                   | -45801                   | -43898             | -48130             |

**Appendix Table 9**

Effect of total exemptions on patent characteristics for small firms

|                         | (1)                 | (2)               | (3)               | (4)               | (5)               |
|-------------------------|---------------------|-------------------|-------------------|-------------------|-------------------|
| Dependent Variable      | Num. Patents        | Forward Cites     | Generality        | Originality       | Exploration       |
| Total Exemptions        | -0.077**<br>[0.032] | -0.064<br>[0.050] | -0.047<br>[0.045] | -0.008<br>[0.030] | -0.037<br>[0.029] |
| Time-Varying State Vars | Yes                 | Yes               | Yes               | Yes               | Yes               |
| Subcategory*Trend       | Yes                 | Yes               | Yes               | Yes               | Yes               |
| Calendar Year Effects   | Yes                 | Yes               | Yes               | Yes               | Yes               |
| Assignee Fixed Effects  | Yes                 | Yes               | Yes               | Yes               | Yes               |
| Observations            | 284,621             | 237,256           | 181,175           | 247,028           | 284,621           |
| Number of assignees     | 40,811              | 32,094            | 23,884            | 35,495            | 40,811            |
| Log likelihood          | -107079             | -351442           | -377738           | -40997            | -89568            |

**Appendix Table 10**

Effect of total exemptions on distribution of patent citations for small firms

|                         | (1)                   | (2)                   | (3)                   | (4)                 | (5)                 |
|-------------------------|-----------------------|-----------------------|-----------------------|---------------------|---------------------|
| Dependent Variable:     | Standard<br>Deviation | Bottom<br>10th Pctile | Bottom<br>25th Pctile | Top 25th<br>Pctile  | Top 10th<br>Pctile  |
| Total Exemptions        | -0.190***<br>[0.068]  | -0.070*<br>[0.040]    | -0.070*<br>[0.037]    | -0.097**<br>[0.049] | -0.141**<br>[0.070] |
| Time-Varying State Vars | Yes                   | Yes                   | Yes                   | Yes                 | Yes                 |
| Subcategory*Trend       | Yes                   | Yes                   | Yes                   | Yes                 | Yes                 |
| Calendar Year Effects   | Yes                   | Yes                   | Yes                   | Yes                 | Yes                 |
| Assignee Fixed Effects  | Yes                   | Yes                   | Yes                   | Yes                 | Yes                 |
| Observations            | 59,057                | 115,452               | 163,773               | 86,413              | 38,643              |
| Number of assignees     | 7,537                 | 17,584                | 23,384                | 11,794              | 5,278               |
| Log likelihood          | -299972               | -301321               | -301271               | -278440             | -280983             |

**Appendix Table 11**

Effect of homestead exemptions dummy on patent characteristics for small firms

|                         | (1)                  | (2)                  | (3)                  | (4)                  | (5)                  |
|-------------------------|----------------------|----------------------|----------------------|----------------------|----------------------|
| Dependent Variable      | Num. Patents         | Forward Cites        | Generality           | Originality          | Exploration          |
| Homestead dummy         | -0.292***<br>[0.031] | -0.263***<br>[0.061] | -0.331***<br>[0.041] | -0.270***<br>[0.026] | -0.291***<br>[0.026] |
| Time-Varying State Vars | Yes                  | Yes                  | Yes                  | Yes                  | Yes                  |
| Subcategory*Trend       | Yes                  | Yes                  | Yes                  | Yes                  | Yes                  |
| Calendar Year Effects   | Yes                  | Yes                  | Yes                  | Yes                  | Yes                  |
| Assignee Fixed Effects  | Yes                  | Yes                  | Yes                  | Yes                  | Yes                  |
| Observations            | 284,621              | 237,256              | 181,175              | 247,028              | 284,621              |
| Number of assignees     | 40,811               | 32,094               | 23,884               | 35,495               | 40,811               |
| Log likelihood          | -106929              | -351037              | -377042              | -40952               | -89443               |

**Appendix Table 12**

Effect of homestead exemptions dummy on distribution of patent citations for small firms

|                         | (1)                   | (2)                   | (3)                   | (4)                  | (5)                  |
|-------------------------|-----------------------|-----------------------|-----------------------|----------------------|----------------------|
| Dependent Variable:     | Standard<br>Deviation | Bottom<br>10th Pctile | Bottom<br>25th Pctile | Top 25th<br>Pctile   | Top 10th<br>Pctile   |
| Homestead dummy         | -0.176**<br>[0.084]   | -0.365***<br>[0.042]  | -0.323***<br>[0.037]  | -0.308***<br>[0.054] | -0.222***<br>[0.079] |
| Time-Varying State Vars | Yes                   | Yes                   | Yes                   | Yes                  | Yes                  |
| Subcategory*Trend       | Yes                   | Yes                   | Yes                   | Yes                  | Yes                  |
| Calendar Year Effects   | Yes                   | Yes                   | Yes                   | Yes                  | Yes                  |
| Assignee Fixed Effects  | Yes                   | Yes                   | Yes                   | Yes                  | Yes                  |
| Observations            | 59,057                | 115,452               | 163,773               | 86,413               | 38,643               |
| Number of assignees     | 7,537                 | 17,584                | 23,384                | 11,794               | 5,278                |
| Log likelihood          | -300092               | -300695               | -300761               | -278059              | -280897              |

**Appendix Table 13**

Effect of homestead exemptions on patent characteristics for small firms, no Massachusetts

|                         | (1)                  | (2)               | (3)                  | (4)                  | (5)                  |
|-------------------------|----------------------|-------------------|----------------------|----------------------|----------------------|
| Dependent Variable      | Num. Patents         | Forward Cites     | Generality           | Originality          | Exploration          |
| Homestead exemptions    | -0.600***<br>[0.132] | -0.243<br>[0.222] | -0.434***<br>[0.144] | -0.290***<br>[0.088] | -0.367***<br>[0.083] |
| Time-Varying State Vars | Yes                  | Yes               | Yes                  | Yes                  | Yes                  |
| Subcategory*Trend       | Yes                  | Yes               | Yes                  | Yes                  | Yes                  |
| Calendar Year Effects   | Yes                  | Yes               | Yes                  | Yes                  | Yes                  |
| Assignee Fixed Effects  | Yes                  | Yes               | Yes                  | Yes                  | Yes                  |
| Massachusetts?          | No                   | No                | No                   | No                   | No                   |
| Observations            | 271,955              | 226,222           | 172,123              | 235,730              | 271,955              |
| Number of assignees     | 39,017               | 30,618            | 22,695               | 33,886               | 39,017               |
| Log likelihood          | -101978              | -338445           | -363360              | -38961               | -85358               |

**Appendix Table 14**

Effect of homestead exemptions on distribution of patent citations for small firms, no Massachusetts

|                         | (1)                   | (2)                   | (3)                   | (4)                  | (5)                |
|-------------------------|-----------------------|-----------------------|-----------------------|----------------------|--------------------|
| Dependent Variable:     | Standard<br>Deviation | Bottom 10th<br>Pctile | Bottom 25th<br>Pctile | Top 25th<br>Pctile   | Top 10th<br>Pctile |
| Homestead exemptions    | -0.479*<br>[0.265]    | -0.373***<br>[0.115]  | -0.360***<br>[0.112]  | -0.440***<br>[0.147] | -0.345*<br>[0.206] |
| Time-Varying State Vars | Yes                   | Yes                   | Yes                   | Yes                  | Yes                |
| Subcategory*Trend       | Yes                   | Yes                   | Yes                   | Yes                  | Yes                |
| Calender Year Effects   | Yes                   | Yes                   | Yes                   | Yes                  | Yes                |
| Assignee Fixed Effects  | Yes                   | Yes                   | Yes                   | Yes                  | Yes                |
| Massachusetts?          | No                    | No                    | No                    | No                   | No                 |
| Observations            | 55,655                | 110,372               | 156,572               | 81,498               | 36,151             |
| Number of assignees     | 7,098                 | 16,814                | 22,365                | 11,134               | 4,932              |
| Log likelihood          | -289127               | -292882               | -291383               | -269031              | -271652            |

**Appendix Table 15**

Effect of homestead exemptions on patent characteristics for small firms, no Massachusetts for 2000-2005

| Dependent Variable       | (1)<br>Num. Patents  | (2)<br>Forward Cites | (3)<br>Generality    | (4)<br>Originality   | (5)<br>Exploration   |
|--------------------------|----------------------|----------------------|----------------------|----------------------|----------------------|
| Homestead exemptions     | -0.416***<br>[0.092] | -0.244<br>[0.222]    | -0.434***<br>[0.144] | -0.289***<br>[0.088] | -0.367***<br>[0.083] |
| Time-Varying State Vars  | Yes                  | Yes                  | Yes                  | Yes                  | Yes                  |
| Subcategory*Trend        | Yes                  | Yes                  | Yes                  | Yes                  | Yes                  |
| Calender Year Effects    | Yes                  | Yes                  | Yes                  | Yes                  | Yes                  |
| Assignee Fixed Effects   | Yes                  | Yes                  | Yes                  | Yes                  | Yes                  |
| Massachusetts 2000-2005? | No                   | No                   | No                   | No                   | No                   |
| Observations             | 275,037              | 229,028              | 174,442              | 238,384              | 275,037              |
| Number of assignees      | 39,814               | 31,343               | 23,292               | 34,576               | 39,814               |
| Log likelihood           | -103542              | -340312              | -365820              | -39516               | -86604               |

**Appendix Table 16**

Effect of homestead exemptions on distribution of patent citations for small firms, no Massachusetts for 2000-2005

|                          | (1)                   | (2)                   | (3)                   | (4)                  | (5)                |
|--------------------------|-----------------------|-----------------------|-----------------------|----------------------|--------------------|
| Dependent Variable:      | Standard<br>Deviation | Bottom 10th<br>Pctile | Bottom 25th<br>Pctile | Top 25th Pctile      | Top 10th Pctile    |
| Homestead exemptions     | -0.480*<br>[0.265]    | -0.373***<br>[0.115]  | -0.360***<br>[0.112]  | -0.360***<br>[0.112] | -0.346*<br>[0.206] |
| Time-Varying State Vars  | Yes                   | Yes                   | Yes                   | Yes                  | Yes                |
| Subcategory*Trend        | Yes                   | Yes                   | Yes                   | Yes                  | Yes                |
| Calender Year Effects    | Yes                   | Yes                   | Yes                   | Yes                  | Yes                |
| Assignee Fixed Effects   | Yes                   | Yes                   | Yes                   | Yes                  | Yes                |
| Massachusetts 2000-2005? | No                    | No                    | No                    | No                   | No                 |
| Observations             | 56,482                | 111,290               | 158,160               | 82,630               | 36,681             |
| Number of assignees      | 7,297                 | 17,035                | 22,753                | 11,428               | 5,072              |
| Log likelihood           | -290933               | -293556               | -293104               | -270540              | -272728            |

**Appendix Table 17**

Effect of homestead exemptions on patent characteristics for small firms, no confounding laws

|                         | (1)                 | (2)               | (3)              | (4)              | (5)               |
|-------------------------|---------------------|-------------------|------------------|------------------|-------------------|
| Dependent Variable      | Num. Patents        | Forward Cites     | Generality       | Originality      | Exploration       |
| Homestead exemptions    | -0.071**<br>[0.033] | -0.048<br>[0.052] | -0.04<br>[0.047] | 0.002<br>[0.031] | -0.028<br>[0.030] |
| Time-Varying State Vars | Yes                 | Yes               | Yes              | Yes              | Yes               |
| Subcategory*Trend       | Yes                 | Yes               | Yes              | Yes              | Yes               |
| Calendar Year Effects   | Yes                 | Yes               | Yes              | Yes              | Yes               |
| Assignee Fixed Effects  | Yes                 | Yes               | Yes              | Yes              | Yes               |
| Observations            | 236,442             | 194,455           | 147,222          | 204,958          | 236,442           |
| Number of assignees     | 37,439              | 29,050            | 21,459           | 32,541           | 37,439            |
| Log likelihood          | -89488              | -300601           | -322846          | -34084           | -74718            |

**Appendix Table 18**

Effect of homestead exemptions on distribution of patent citations for small firms, no confounding laws

| Dependent Variable:     | (1)<br>Standard<br>Deviation | (2)<br>Bottom 10th<br>Pctile | (3)<br>Bottom 25th<br>Pctile | (4)<br>Top 25th<br>Pctile | (5)<br>Top 10th<br>Pctile |
|-------------------------|------------------------------|------------------------------|------------------------------|---------------------------|---------------------------|
| Homestead exemptions    | -0.194***<br>[0.072]         | -0.065<br>[0.040]            | -0.066*<br>[0.038]           | -0.087*<br>[0.049]        | -0.138*<br>[0.071]        |
| Time-Varying State Vars | Yes                          | Yes                          | Yes                          | Yes                       | Yes                       |
| Subcategory*Trend       | Yes                          | Yes                          | Yes                          | Yes                       | Yes                       |
| Calendar Year Effects   | Yes                          | Yes                          | Yes                          | Yes                       | Yes                       |
| Assignee Fixed Effects  | Yes                          | Yes                          | Yes                          | Yes                       | Yes                       |
| Observations            | 47,967                       | 96,591                       | 134,752                      | 69,796                    | 30,892                    |
| Number of asscode       | 6,838                        | 16,310                       | 21,297                       | 10,605                    | 4,718                     |
| Log likelihood          | -255323                      | -257566                      | -257040                      | -237704                   | -239608                   |

**Appendix Table 19**

Effect of homestead exemptions on 5-year forward citations for small firms

|                         | (1)               | (2)               | (3)               | (4)                | (5)                 |
|-------------------------|-------------------|-------------------|-------------------|--------------------|---------------------|
| Year Sample             | All               | < 2005            | < 2004            | < 2003             | < 2002              |
| Homestead exemptions    | -0.060<br>[0.047] | -0.058<br>[0.051] | -0.088<br>[0.057] | -0.109*<br>[0.059] | -0.130**<br>[0.064] |
| Time-Varying State Vars | Yes               | Yes               | Yes               | Yes                | Yes                 |
| Subcategory*Trend       | Yes               | Yes               | Yes               | Yes                | Yes                 |
| Calendar Year Effects   | Yes               | Yes               | Yes               | Yes                | Yes                 |
| Assignee Fixed Effects  | Yes               | Yes               | Yes               | Yes                | Yes                 |
| Observations            | 237,256           | 203,196           | 169,963           | 138,577            | 109,635             |
| Number of asscode       | 32,094            | 30,394            | 28,033            | 25,296             | 22,309              |
| Log likelihood          | -210644           | -200446           | -184472           | -163128            | -137778             |

**Appendix Table 20**

Effect of homestead exemptions on patent generality for small firms

|                         | (1)               | (2)               | (3)               | (4)               | (5)                 |
|-------------------------|-------------------|-------------------|-------------------|-------------------|---------------------|
| Year Sample             | All               | < 2005            | < 2004            | < 2003            | < 2002              |
| Homestead exemptions    | -0.038<br>[0.042] | -0.031<br>[0.045] | -0.055<br>[0.048] | -0.074<br>[0.048] | -0.111**<br>[0.052] |
| Time-Varying State Vars | Yes               | Yes               | Yes               | Yes               | Yes                 |
| Subcategory*Trend       | Yes               | Yes               | Yes               | Yes               | Yes                 |
| Calendar Year Effects   | Yes               | Yes               | Yes               | Yes               | Yes                 |
| Assignee Fixed Effects  | Yes               | Yes               | Yes               | Yes               | Yes                 |
| Observations            | 181,175           | 156,025           | 131,203           | 107,360           | 85,042              |
| Number of asrcode       | 23,884            | 22,842            | 21,315            | 19,364            | 17,154              |
| Log likelihood          | -22253            | -20942            | -19026            | -16614            | -13896              |

**Appendix Table 21**

Effect of homestead exemptions on standard deviation of patent citations for small firms

|                         | (1)                  | (2)                  | (3)                  | (4)                  | (5)                  |
|-------------------------|----------------------|----------------------|----------------------|----------------------|----------------------|
| Year Sample             | All                  | < 2005               | < 2004               | < 2003               | < 2002               |
| Homestead exemptions    | -0.182***<br>[0.038] | -0.087***<br>[0.028] | -0.238***<br>[0.045] | -0.166***<br>[0.031] | -0.179***<br>[0.031] |
| Time-Varying State Vars | Yes                  | Yes                  | Yes                  | Yes                  | Yes                  |
| Subcategory*Trend       | Yes                  | Yes                  | Yes                  | Yes                  | Yes                  |
| Calendar Year Effects   | Yes                  | Yes                  | Yes                  | Yes                  | Yes                  |
| Assignee Fixed Effects  | Yes                  | Yes                  | Yes                  | Yes                  | Yes                  |
| Observations            | 59,057               | 50,606               | 42,318               | 34,346               | 26,945               |
| Number of asscode       | 7,537                | 7,088                | 6,525                | 5,852                | 5,082                |
| Log likelihood          | -296946              | -244834              | -199761              | -159682              | -124030              |

**Appendix Table 22**

Effect of homestead exemptions on number of patent citations in bottom 10th percentile for small firms

|                         | (1)                 | (2)                  | (3)                  | (4)                  | (5)                  |
|-------------------------|---------------------|----------------------|----------------------|----------------------|----------------------|
| Year Sample             | All                 | < 2005               | < 2004               | < 2003               | < 2002               |
| Homestead exemptions    | -0.074**<br>[0.034] | -0.094***<br>[0.036] | -0.137***<br>[0.049] | -0.201***<br>[0.037] | -0.218***<br>[0.031] |
| Time-Varying State Vars | Yes                 | Yes                  | Yes                  | Yes                  | Yes                  |
| Subcategory*Trend       | Yes                 | Yes                  | Yes                  | Yes                  | Yes                  |
| Calendar Year Effects   | Yes                 | Yes                  | Yes                  | Yes                  | Yes                  |
| Assignee Fixed Effects  | Yes                 | Yes                  | Yes                  | Yes                  | Yes                  |
| Observations            | 115,452             | 92,223               | 72,164               | 55,368               | 41,470               |
| Number of asscode       | 17,584              | 14,787               | 12,315               | 10,091               | 8,208                |
| Log likelihood          | -278532             | -232819              | -190731              | -152962              | -119858              |

**Appendix Table 23**

Effect of homestead exemptions on number of patent citations in bottom 25th percentile for small firms

|                         | (1)                 | (2)                  | (3)                 | (4)                  | (5)                  |
|-------------------------|---------------------|----------------------|---------------------|----------------------|----------------------|
| Year Sample             | All                 | < 2005               | < 2004              | < 2003               | < 2002               |
| Homestead exemptions    | -0.075**<br>[0.031] | -0.094***<br>[0.036] | -0.127**<br>[0.050] | -0.173***<br>[0.040] | -0.173***<br>[0.031] |
| Time-Varying State Vars | Yes                 | Yes                  | Yes                 | Yes                  | Yes                  |
| Subcategory*Trend       | Yes                 | Yes                  | Yes                 | Yes                  | Yes                  |
| Calendar Year Effects   | Yes                 | Yes                  | Yes                 | Yes                  | Yes                  |
| Assignee Fixed Effects  | Yes                 | Yes                  | Yes                 | Yes                  | Yes                  |
| Observations            | 163,773             | 135,803              | 110,789             | 88,647               | 68,794               |
| Number of asscode       | 23,384              | 20,737               | 18,365              | 16,044               | 13,733               |
| Log likelihood          | -277080             | -231953              | -190592             | -153626              | -121676              |

**Appendix Table 24**

Effect of homestead exemptions on number of patent citations in top 25th percentile for small firms

|                         | (1)                  | (2)                 | (3)                  | (4)                 | (5)                  |
|-------------------------|----------------------|---------------------|----------------------|---------------------|----------------------|
| Year Sample             | All                  | < 2005              | < 2004               | < 2003              | < 2002               |
| Homestead exemptions    | -0.080***<br>[0.028] | -0.061**<br>[0.029] | -0.095***<br>[0.029] | -0.087**<br>[0.036] | -0.115***<br>[0.042] |
| Time-Varying State Vars | Yes                  | Yes                 | Yes                  | Yes                 | Yes                  |
| Subcategory*Trend       | Yes                  | Yes                 | Yes                  | Yes                 | Yes                  |
| Calender Year Effects   | Yes                  | Yes                 | Yes                  | Yes                 | Yes                  |
| Assignee Fixed Effects  | Yes                  | Yes                 | Yes                  | Yes                 | Yes                  |
| Observations            | 86,413               | 72,966              | 60,181               | 48,237              | 37,354               |
| Number of asscode       | 11,794               | 10,894              | 9,900                | 8,739               | 7,518                |
| Log likelihood          | -261566              | -215481             | -173952              | -137348             | -106182              |

**Appendix Table 25**

Effect of homestead exemptions on number of patent citations in top 10th percentile for small firms

|                         | (1)                  | (2)                  | (3)                  | (4)                  | (5)                  |
|-------------------------|----------------------|----------------------|----------------------|----------------------|----------------------|
| Year Sample             | All                  | < 2005               | < 2004               | < 2003               | < 2002               |
| Homestead exemptions    | -0.114***<br>[0.027] | -0.099***<br>[0.021] | -0.190***<br>[0.027] | -0.214***<br>[0.046] | -0.214***<br>[0.058] |
| Time-Varying State Vars | Yes                  | Yes                  | Yes                  | Yes                  | Yes                  |
| Subcategory*Trend       | Yes                  | Yes                  | Yes                  | Yes                  | Yes                  |
| Calender Year Effects   | Yes                  | Yes                  | Yes                  | Yes                  | Yes                  |
| Assignee Fixed Effects  | Yes                  | Yes                  | Yes                  | Yes                  | Yes                  |
| Observations            | 38,643               | 32,365               | 26,442               | 20,953               | 16,101               |
| Number of asscode       | 5,278                | 4,846                | 4,346                | 3,799                | 3,238                |
| Log likelihood          | -267104              | -215397              | -172414              | -135192              | -102733              |

**Appendix Table 26**

Distribution of patent citations scaled by patent counts

|                      | (1)                  | (2)                  | (3)               | (4)                 |
|----------------------|----------------------|----------------------|-------------------|---------------------|
| Dependent Variable:  | Bottom 10th Pctile   | Bottom 25th Pctile   | Top 25th Pctile   | Top 10th Pctile     |
| Homestead exemptions | -0.039***<br>[0.011] | -0.034***<br>[0.010] | -0.016<br>[0.010] | -0.022**<br>[0.010] |
| Control Variables    | Yes                  | Yes                  | Yes               | Yes                 |
| Year Dummies         | Yes                  | Yes                  | Yes               | Yes                 |
| Firm Fixed Effects   | Yes                  | Yes                  | Yes               | Yes                 |
| Subcategory*Trend    | Yes                  | Yes                  | Yes               | Yes                 |
| Observations         | 115,452              | 163,773              | 86,413            | 38,643              |
| Number of Firms      | 17,584               | 23,384               | 11,794            | 5,278               |
| Log likelihood       | -202080              | -201220              | -174186           | -167590             |

**Appendix Table 27**

Effect of personal bankruptcy exemptions on individual inventors (at the state-technology-year level)

| Dependent Variable                    | (1)                             | (2)                                      | (3)                                     |
|---------------------------------------|---------------------------------|------------------------------------------|-----------------------------------------|
|                                       | Patents by Individual Inventors |                                          |                                         |
| Sample                                | Full                            | High External<br>Financing<br>Dependence | Low External<br>Financing<br>Dependence |
| Homestead Exemption                   | -0.039<br>[0.036]               | -0.072***<br>[0.021]                     | -0.001<br>[0.080]                       |
| Time-Varying State Specific Variables | Yes                             | Yes                                      | Yes                                     |
| Subclass Fixed Effects                | Yes                             | Yes                                      | Yes                                     |
| Subclass*Trend                        | Yes                             | Yes                                      | Yes                                     |
| Calender Year Effects                 | Yes                             | Yes                                      | Yes                                     |
| State Fixed Effects                   | Yes                             | Yes                                      | Yes                                     |
| Observations (state-subclass-years)   | 19,800                          | 9,900                                    | 9,900                                   |
| Log Likelihood                        | -11375                          | -5071                                    | -6073                                   |

**Appendix Table 28**

Effect of homestead exemptions on innovation at the state-technology-year level

|                           | (1)                 | (2)                  | (3)                | (4)               | (5)               | (6)                  | (7)                 | (8)                 | (9)                  | (10)                 |
|---------------------------|---------------------|----------------------|--------------------|-------------------|-------------------|----------------------|---------------------|---------------------|----------------------|----------------------|
| Dependent Variable:       | Patents             | Forward Cites        | Generality         | Originality       | Exploration       | Standard Deviation   | Bottom 10th Pctile  | Bottom 25th Pctile  | Top 25th Pctile      | Top 10th Pctile      |
| Homestead exemptions      | -0.050**<br>[0.020] | -0.047***<br>[0.016] | -0.035*<br>[0.020] | -0.010<br>[0.020] | -0.028<br>[0.019] | -0.070***<br>[0.022] | -0.064**<br>[0.027] | -0.059**<br>[0.026] | -0.046***<br>[0.018] | -0.057***<br>[0.019] |
| Control Variables         | Yes                 | Yes                  | Yes                | Yes               | Yes               | Yes                  | Yes                 | Yes                 | Yes                  | Yes                  |
| Year Dummies              | Yes                 | Yes                  | Yes                | Yes               | Yes               | Yes                  | Yes                 | Yes                 | Yes                  | Yes                  |
| State Fixed Effects       | Yes                 | Yes                  | Yes                | Yes               | Yes               | Yes                  | Yes                 | Yes                 | Yes                  | Yes                  |
| Subcategory Fixed Effects | Yes                 | Yes                  | Yes                | Yes               | Yes               | Yes                  | Yes                 | Yes                 | Yes                  | Yes                  |
| Subcategory*Trend         | Yes                 | Yes                  | Yes                | Yes               | Yes               | Yes                  | Yes                 | Yes                 | Yes                  | Yes                  |
| Observations              | 19,800              | 19,800               | 19,800             | 19,800            | 19,800            | 19,800               | 19,800              | 19,800              | 19,800               | 19,800               |
| Number of States          | 50                  | 50                   | 50                 | 50                | 50                | 50                   | 50                  | 50                  | 50                   | 50                   |
| Log likelihood            | -41647              | -133520              | -133385            | -20364            | -34461            | -173319              | -116372             | -105207             | -133033              | -182226              |

**Appendix Table 29**

## Distribution of Incumbents and Entrants

| Year  | Number of small firms | % of Incumbents | % of Entrants |
|-------|-----------------------|-----------------|---------------|
| 1994  | 16543                 | 80.96           | 19.04         |
| 1995  | 19741                 | 83.80           | 16.20         |
| 1996  | 22994                 | 85.85           | 14.15         |
| 1997  | 26520                 | 86.70           | 13.30         |
| 1998  | 29944                 | 88.57           | 11.43         |
| 1999  | 33694                 | 88.87           | 11.13         |
| 2000  | 37668                 | 89.45           | 10.55         |
| 2001  | 41445                 | 90.89           | 9.11          |
| 2002  | 45252                 | 91.59           | 8.41          |
| 2003  | 48890                 | 92.56           | 7.44          |
| 2004  | 52272                 | 93.53           | 6.47          |
| 2005  | 55352                 | 94.44           | 5.56          |
| Total | 430315                | 90.25           | 9.75          |
